# Supplementary material for: Silicon and Nitric Oxide Applications Allow Mitigation of Water Stress in Myrobalan 29C Rootstocks (Prunus cerasifera Ehrh.)
Source: MDPI journal article supplement (doi:10.3390/agriculture12081273), 2022-08-20
Supplement: s1 [file s1]

### Supplementary Material

**Table S1.** K content in leaves and Fe content in roots of Myrobolan 29C rootstocks subjected to different irrigation regimes and chemical treatments.

| Irrigation regime                      | Leaf K (%)    | Root Fe (ppm) |
|----------------------------------------|---------------|---------------|
| Non-water stress                       | 2.90a         | 13.92a        |
| Water stress                           | 2.25b         | 5.72b         |
| <i>t-test</i> (significance level)     | $p \leq 0.01$ | $p \leq 0.05$ |
| Chemicals applications                 |               |               |
| Control                                | 2.45cd        | 8.65c         |
| Si                                     | 2.55bc        | 9.90b         |
| NO                                     | 2.50c         | 9.80b         |
| Si+NO                                  | 2.80a         | 10.95a        |
| <i>Tukey test</i> (significance level) | $p \leq 0.01$ | $p \leq 0.05$ |

For a given factor and significance, different letters within a column represent significant differences.
