# Supplementary material for: Silicon and Nitric Oxide Applications Allow Mitigation of Water Stress in Myrobalan 29C Rootstocks (Prunus cerasifera Ehrh.)
Source: MDPI journal article supplement (doi:10.3390/agriculture12081273), 2022-08-20
Supplement: s1 [file s1]

Archive with 1 entries (1 files):
- agriculture-1861782-supplementary.pdf
